## Evaluation of secondary prevention in Egyptian patients after primary percutaneous coronary intervention

Thabet NAGWA<sup>1</sup>; Dina LABIB<sup>2</sup>; Samir AHMED<sup>2</sup>; Hosny M.<sup>2</sup>; Hassan AHMED<sup>2</sup>; Hekal SOHA<sup>3</sup>; Ibrahim AYMAN<sup>4</sup>; Mansour HOSSAM<sup>4</sup>; Zain-Eldin Hafez M.<sup>5</sup>; Farrag AZZA<sup>2</sup>; El-Guindy AHMED<sup>3</sup>

<sup>1</sup>Aswan Heart Centre, Aswan university, Aswan, Egypt

<sup>2</sup>Cairo University, Cardiology department, Cairo, Egypt

<sup>3</sup>Aswan Heart Centre, Adult Cardiology Department, Aswan, Egypt

<sup>4</sup>Aswan university, Aswan, Egypt

<sup>5</sup>Assiut University, Internal medicine, Assiut, Egypt

**Funding Acknowledgements:** Type of funding sources: None.

**Background:** Effective secondary prevention after acute coronary syndromes is critical to reducing the risk of a subsequent cardiovascular event. Adherence to secondary prevention is disappointingly low worldwide, with no data in Upper Egypt.

**Purpose and methods:** We sought to determine the prevalence of adherence to secondary preventive among patients who underwent primary percutaneous coronary intervention (PPCI) in a tertiary centre in Upper Egypt from 2014-2016 (n = 468).

**Results:** Our cohort included 468 patients, mean age at STEMI was  $55.7 \pm 11.2$  years; 79% males. Smoking, diabetes mellitus (DM), dyslipidemia, obesity and hypertension were 62%, 42%, 39%, 38% and 34% respectively. Median follow-up duration (IQR) was 703 (613-830) days. Table 1 shows the prevalence of adherence secondary prevention. Re-myocardial infarction, unstable angina, repeated hospital admission was 4.9%, 5.1%, 14% respectively. Revascularizations were 8.1% and total ischemic complications were 18%. The major adverse cardiac events MACEs were 24%. DM and hypertension were significant predictors of MACEs on univariable and multivariable analysis (multivariable ORs [95% CIs]: 1.685 [1.002-2.833] and 1.764 [1.033-3.012], respectively).

**Conclusion:** Adherence to secondary prevention after PPCI is sub-optimal in Upper Egypt. We need to raise the standard of preventive cardiology care through more effective primary and secondary prevention programs, to reduce morbidity and mortality.

| Risk factor                  | Target level                                     | Number (%) |
|------------------------------|--------------------------------------------------|------------|
| Diabetes                     | HbA1c <7%                                        | 280(62)    |
| Blood pressure               | <140/90                                          | 295(63)    |
| Smoking cessation in smokers | Complete cessation                               | 122 (43)   |
| Smoking status               | No smoking                                       | 301(65)    |
| Physical activity            | Walking at least 30 minutes 5 days/week          | 301(60)    |
| Body mass index              | <25 kg/m <sup>2</sup>                            | 101(22)    |
| Waist circumference          | <102 cm in males, <88 cm in females              | 164(36)    |
| Diet                         | Low salt and fat, adequate fruits and vegetables | 268 (57)   |
| Lipids                       | LDL < 70 gm/dL                                   | 93(26)     |
